# Supplementary material
Source: PubMed Central journal article supplement (PMC7367755)
Supplement: NIHMS1587096-supplement-2.pdf [file NIHMS1587096-supplement-2.pdf]

**Legend for Supplemental Table S1:**

**Normalized mRNA counts for NanoString PanCancer Pathways Analysis.** RNA was isolated from FFPE MCF-7 tumor specimens from mice treated with EW for 0, 3, or 82 d. Hybridization and subsequent sample analysis were performed per manufacturer's protocol. Raw mRNA counts were normalized using nSolver software, and normalized counts are presented below.
